# Supplementary material
Source: Elsevier journal article supplement (https://www.sciencedirect.com/science/article/pii/S1885585718303608)
Supplement: mmc1 [file mmc1.pdf]

**SUPPLEMENTARY MATERIAL**

**Table 1 of the supplementary material**

Clinical Outcomes With pmLAD CTO vs Non-pmLAD CTO in the Total Population

|                                 |                 |                     | Univariate         |      | Multivariable adjusted* |      |
|---------------------------------|-----------------|---------------------|--------------------|------|-------------------------|------|
|                                 | pmLAD (n = 811) | non-pmLAD (n = 736) | HR (95%CI)         | P    | HR (95%CI)              | P    |
| <b>Cardiac death</b>            | 67 (8.3)        | 36 (4.9)            | 1.67 (1.12 – 2.51) | .013 | 1.63 (1.08 – 2.46)      | .020 |
| <b>MI</b>                       | 16 (2.0)        | 7 (1.0)             | 2.09 (0.86 – 5.08) | .10  | 1.83 (0.74 – 4.52)      | .19  |
| <b>Repeat revascularization</b> | 111 (13.7)      | 103 (14.0)          | 0.97 (0.74 – 1.27) | .82  | 1.06 (0.81 – 1.39)      | .68  |
| <b>MACE</b>                     | 173 (21.3)      | 138 (18.8)          | 1.13 (0.90 – 1.41) | .29  | 1.20 (0.95 – 1.50)      | .12  |

95%CI, 95% confidence interval; CKD, chronic kidney disease; CTO, chronic total occlusion; HR, hazard ratio; MACE, major adverse cardiac event; MI, myocardial infarction; pmLAD: proximal or middle left anterior descending

Values are expressed as No. (%). \*Adjusted covariates include age, acute coronary syndrome, previous PCI, diabetes, CKD, grade of collateral flow, and initial treatment strategy

**Table 2 of the supplementary material**

Estimated Hazard Ratio of Clinical Outcomes After Accounting for Competing Risk Stratified by OMT vs PCI in the Propensity-matched Cohort

| Propensity-matched population   | HR (95%CI)         | <i>P</i> |
|---------------------------------|--------------------|----------|
| <b>pmLAD CTO (n = 522)</b>      |                    |          |
| <i>Cardiac death</i>            | 0.50 (0.27 – 0.92) | .026     |
| <i>MI</i>                       | 2.30 (0.69 – 8.92) | .23      |
| <i>Repeat revascularization</i> | 0.65 (0.42 – 1.02) | .06      |
| <i>MACE*</i>                    | 0.53 (0.28 – 0.99) | .046     |
| <b>non-pmLAD CTO (n = 516)</b>  |                    |          |
| <i>Cardiac death</i>            | 0.62 (0.31 – 1.25) | .62      |
| <i>MI</i>                       | 0.66 (0.11 – 3.94) | .64      |
| <i>Repeat revascularization</i> | 0.77 (0.31 – 1.25) | .26      |
| <i>MACE*</i>                    | 0.53 (0.49 – 1.21) | .11      |

HR and *P* values were estimated with the use of a Fine-Grey subdistribution hazards model; *a*) cardiac death (competing risk = non-cardiac death), *b*) MACE (which included cardiac death) (competing risk = non-cardiac death), and *c*) each component of MACE (competing risk = all-cause death).

95%CI, 95% confidence interval; CTO, chronic total occlusion; HR, hazard ratio; MACE, major adverse cardiac events; MI, myocardial infarction; PCI, percutaneous coronary intervention; pmLAD, proximal or middle left anterior descending coronary artery.

\*MACE included cardiac death, MI, and repeat revascularization.

**Table 3 of the supplementary material**

Clinical Outcomes With OMT or Failed PCI vs Successful PCI in the Total Population (Per-protocol Analysis)

| Propensity-matched population   | OMT or failed PCI | Successful PCI | HR (95%CI)         | <i>P</i> |
|---------------------------------|-------------------|----------------|--------------------|----------|
| <b>pmLAD CTO (n = 522)</b>      |                   |                |                    |          |
| <i>Cardiac death</i>            | 40 (12.6)         | 10 (4.9)       | 0.35 (0.18 – 0.71) | .003     |
| <i>MI</i>                       | 5 (1.6)           | 2 (1.0)        | 0.59 (0.11 – 3.04) | .53      |
| <i>Repeat revascularization</i> | 54 (17.0)         | 23 (11.2)      | 0.54 (0.33 – 0.89) | .014     |
| <i>MACE*</i>                    | 89 (28.1)         | 32 (15.6)      | 0.47 (0.31 – 0.70) | .001     |
| <b>non-pmLAD CTO (n=516)</b>    |                   |                |                    |          |
| <i>Cardiac death</i>            | 16 (5.0)          | 6 (3.1%)       | 0.57 (0.22 – 1.45) | .57      |
| <i>MI</i>                       | 3 (0.9)           | 2 (1.0%)       | 1.04 (0.17 – 6.20) | .97      |
| <i>Repeat revascularization</i> | 46 (14.3)         | 27 (5.7%)      | 0.92 (0.57 – 1.49) | .92      |
| <i>MACE*</i>                    | 62 (19.3)         | 33 (16.9%)     | 0.83 (0.54 – 1.27) | .39      |

95%CI, 95% confidence interval; CTO, chronic total occlusion; HR, hazard ratio; MACE, major adverse cardiac events; MI, myocardial infarction; OMT, optimal medical therapy; PCI, percutaneous coronary intervention; pmLAD, proximal or middle left anterior descending coronary artery.

\*MACE included cardiac death, MI, and repeat revascularization.
